# Supplementary material
Source: PubMed Central journal article supplement (PMC4793813)
Supplement: fram020014.ww1_default.pdf [file fram020014.ww1_default.pdf]

## **Supplemental Appendix**

### **Covariates Included in Disease Risk Index**

#### Medication use in 90 days preceding index date

- Non-potassium sparing diuretics
- Potassium sparing diuretics
- Beta-adrenergic receptor antagonists
- Potassium supplements
- Non-steroidal anti-inflammatory drugs
- Angiotensin converting enzyme inhibitors
- Angiotensin receptor blockers
- Direct renin inhibitors
- Calcium channel blockers
- Digoxin
- Antiarrhythmic drugs
- Nitrates
- Anticoagulants
- Aspirin and other antiplatelet drugs
- Statins
- Fibrates
- Oral hypoglycemic
- Insulin
- Antipsychotics
- Antidepressants
- Prokinetics
- Opiates
- Sedative hypnotics
- Cholinesterase inhibitors

#### Comorbidities in past 5 years:

- Congestive heart failure
- Chronic kidney disease
- Myocardial infarction
- Angina
- Stroke/transient ischemic attack
- Diabetes
- Hypertension
- Pneumonia
- Cardiomyopathy

#### Procedures in past 5 years:

- Angiography
- Coronary artery bypass graft
- Carotid Doppler ultrasonography
- Carotid endarterectomy

Echocardiography  
 Electrocardiogram  
 Holter monitor  
 Nuclear medicine stress test  
 Percutaneous transluminal coronary angioplasty  
 Permanent pacemaker insertion  
 Valve surgery

Emergency department visit in past year  
 Cardiologist visit in past year  
 Number of prescription drugs in past year  
 Socioeconomic status (income quintiles)  
 Charlson co-morbidity index  
 Living in long-term care facility

### Supplementary analysis with congestive heart failure as a covariate

**Table 4. Antibiotic use and the risk of sudden death within 7 days**

| Antibiotic use          | Cases<br>No. (%) | Controls<br>No. (%) | Odds Ratio<br>(95% CI) | Adjusted Odds Ratio<br>(95% CI)* |
|-------------------------|------------------|---------------------|------------------------|----------------------------------|
| Amoxicillin (reference) | 226 (22.0)       | 1098 (29.4)         | 1.0 (reference)        | 1.0 (reference)                  |
| Co-trimoxazole          | 288 (28.0)       | 734 (19.7)          | 1.83 (1.50 to 2.24)    | 1.40 (1.10 to 1.77)              |
| Ciprofloxacin           | 340 (33.1)       | 964 (25.8)          | 1.66 (1.37 to 2.00)    | 1.31 (1.04 to 1.64)              |
| Norfloxacin             | 79 (7.7)         | 455 (12.2)          | 0.81 (0.61 to 1.08)    | 0.73 (0.52 to 1.02)              |
| Nitrofurantoin          | 94 (9.2)         | 482 (12.9)          | 0.87 (0.66 to 1.15)    | 0.63 (0.45 to 0.87)              |

\*Analysis adjusted for congestive heart failure and the disease risk index

**Table 5. Antibiotic use and the risk of sudden death within 14 days**

| Antibiotic use          | Cases<br>No. (%) | Controls<br>No. (%) | Odds Ratio<br>(95% CI) | Adjusted Odds Ratio<br>(95% CI)* |
|-------------------------|------------------|---------------------|------------------------|----------------------------------|
| Amoxicillin (reference) | 418 (22.9)       | 2021 (29.8)         | 1.0 (reference)        | 1.0 (reference)                  |
| Co-trimoxazole          | 474 (25.9)       | 1262 (18.6)         | 1.80 (1.54 to 2.09)    | 1.53 (1.28 to 1.82)              |
| Ciprofloxacin           | 603 (33.0)       | 1888 (27.9)         | 1.50 (1.30 to 1.72)    | 1.17 (0.99 to 1.39)              |
| Norfloxacin             | 158 (8.6)        | 832 (12.3)          | 0.89 (0.73 to 1.09)    | 0.83 (0.65 to 1.04)              |
| Nitrofurantoin          | 174 (9.5)        | 768 (11.3)          | 1.08 (0.88 to 1.32)    | 1.02 (0.81 to 1.30)              |

\*Analysis adjusted for congestive heart failure and the disease risk index

## Supplementary analysis to approximate the absolute risk of sudden death

**Table 6: Sudden death within 14 days of co-trimoxazole or amoxicillin prescriptions**

| <b>Co-trimoxazole</b>                  |         |
|----------------------------------------|---------|
| Number of sudden deaths within 14 days | 674     |
| Total number of prescriptions          | 215,941 |
| Sudden death per 1000 prescriptions    | 3.1     |
| <b>Amoxicillin</b>                     |         |
| Number of sudden deaths within 14 days | 583     |
| Total number of prescriptions          | 446,300 |
| Sudden death per 1000 prescriptions    | 1.3     |

Note: in this analysis a patient taking an ACE or ARB may have multiple prescriptions for cotrimoxazole

Because case-control studies cannot provide estimates of absolute risk, we conducted a supplementary analysis to contextualize our results. We determined the number of sudden cardiac deaths within 2 weeks of a prescription for co-trimoxazole among patients taking either an ACEI or ARB (numerator), relative to the total number of prescriptions for co-trimoxazole in the same subset of patients (denominator). This exercise was repeated for amoxicillin.
